# Supplementary material for: Genome-Wide Survey for Microdeletions or -Duplications in 155 Patients with Lower Urinary Tract Obstructions (LUTO)
Source: MDPI journal article supplement (doi:10.3390/genes12091449), 2021-09-20
Supplement: s1 [file s1]

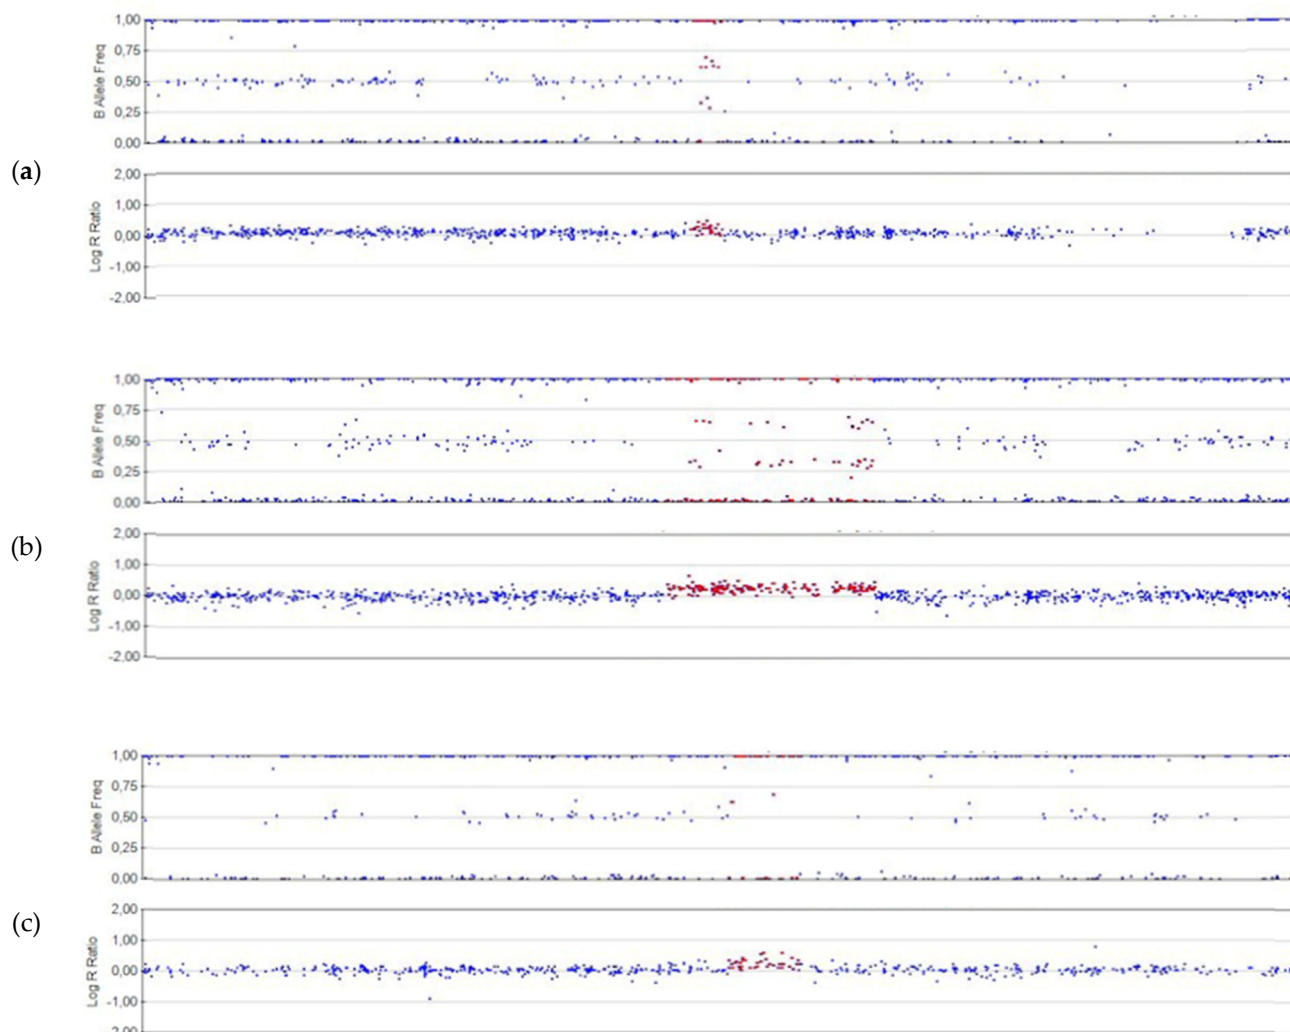

**Supplemental Figure 1.** Illumina GSA 1.0 hybridization plot of microduplications at 1p36.21, 5q23.2 and 10q23.31 in patients with LUTO. Log R ratio (bottom) represents a measure of the signal intensity for each marker and B allele frequency (top) denotes an allelic intensity ratio for each SNP. **(a)** dup1p36.21 detected in patient 100009 with LUTO; **(b)** dup5q23.2 detected in patient 100243 with PUV; **(c)** dup10q23.31 detected in patient 100295 with PUV.
